# Supplementary material
Source: publisher site journal article supplement (https://www.dovepress.com/article/615470)
Supplement: Supplementary file 1 [file 615470%20Supplementary%20Materials.docx]

**Supplementary Table 1** TE value of cortical-muscle and muscle-cortical directional in the Tai Chi group (TC group), brisk walking group (BW group), and control group. (mean ± SD)

|  | cortico-muscular | | | muscle-cortical | | |
| --- | --- | --- | --- | --- | --- | --- |
|  | TC | BW | control | TC | BW | control |
| lTA-lPFC | 0.16±0.02 | 0.16±0.03 | 0.15±0.03 | 0.05±0.05 | 0.05±0.05 | 0.04±0.03 |
| lTA-rPFC | 0.16±0.02 | 0.16±0.03 | 0.16±0.03 | 0.05±0.04 | 0.05±0.05 | 0.05±0.03 |
| lTA-lM1 | 0.16±0.02 | 0.17±0.03 | 0.16±0.03 | 0.05±0.04 | 0.05±0.06 | 0.05±0.03 |
| lTA-rM1 | 0.16±0.02 | 0.16±0.03 | 0.16±0.02 | 0.05±0.04 | 0.05±0.06 | 0.05±0.04 |
| lTA-lS1 | 0.16±0.03 | 0.16±0.03 | 0.16±0.03 | 0.05±0.04 | 0.05±0.04 | 0.05±0.03 |
| lTA-rS1 | 0.17±0.02 | 0.17±0.02 | 0.15±0.01 | 0.05±0.04 | 0.04±0.03 | 0.04±0.03 |
| lTA-lSMA | 0.16±0.02 | 0.16±0.03 | 0.15±0.01 | 0.05±0.04 | 0.05±0.05 | 0.04±0.03 |
| lTA-rSMA | 0.17±0.02 | 0.17±0.02 | 0.15±0.02 | 0.05±0.05 | 0.05±0.05 | 0.05±0.03 |
| rTA-lPFC | 0.16±0.03 | 0.16±0.03 | 0.16±0.02 | 0.04±0.03 | 0.04±0.03 | 0.05±0.03 |
| rTA-rPFC | 0.16±0.03 | 0.16±0.03 | 0.16±0.03 | 0.04±0.04 | 0.04±0.02 | 0.06±0.04 |
| rTA-lM1 | 0.17±0.04 | 0.17±0.03 | 0.16±0.03 | 0.04±0.03 | 0.04±0.04 | 0.05±0.04 |
| rTA-rM1 | 0.16±0.03 | 0.17±0.03 | 0.16±0.02 | 0.04±0.03 | 0.04±0.03 | 0.05±0.03 |
| rTA-lS1 | 0.17±0.03 | 0.17±0.03 | 0.16±0.03 | 0.04±0.02 | 0.04±0.03 | 0.06±0.04 |
| rTA-rS1 | 0.17±0.07 | 0.17±0.03 | 0.16±0.03 | 0.04±0.03 | 0.04±0.03 | 0.05±0.04 |
| rTA-lSMA | 0.17±0.03 | 0.16±0.03 | 0.16±0.02 | 0.04±0.03 | 0.04±0.03 | 0.05±0.04 |
| rTA-rSMA | 0.17±0.03 | 0.17±0.03 | 0.16±0.02 | 0.04±0.03 | 0.04±0.03 | 0.05±0.04 |
| lMG-lPFC | 0.18±0.02 | 0.17±0.02 | 0.16±0.02 | 0.05±0.05 | 0.06±0.05 | 0.04±0.02 |
| lMG-rPFC | 0.18±0.02 | 0.17±0.02 | 0.16±0.02 | 0.05±0.05 | 0.06±0.06 | 0.04±0.03 |
| lMG-lM1 | 0.17±0.03 | 0.18±0.04 | 0.16±0.04 | 0.05±0.05 | 0.06±0.07 | 0.04±0.02 |
| lMG-rM1 | 0.17±0.03 | 0.17±0.03 | 0.16±0.04 | 0.05±0.04 | 0.06±0.06 | 0.04±0.02 |
| lMG-lS1 | 0.18±0.04 | 0.17±0.03 | 0.16±0.04 | 0.05±0.04 | 0.06±0.06 | 0.04±0.02 |
| lMG-rS1 | 0.18±0.02 | 0.18±0.02 | 0.16±0.03 | 0.05±0.05 | 0.05±0.04 | 0.04±0.02 |
| lMG-lSMA | 0.18±0.04 | 0.17±0.03 | 0.16±0.04 | 0.05±0.05 | 0.06±0.07 | 0.04±0.02 |
| lMG-rSMA | 0.18±0.02 | 0.17±0.02 | 0.16±0.02 | 0.05±0.05 | 0.06±0.06 | 0.04±0.02 |
| rMG-lPFC | 0.16±0.03 | 0.16±0.03 | 0.16±0.02 | 0.04±0.03 | 0.04±0.03 | 0.05±0.03 |
| rMG-rPFC | 0.16±0.03 | 0.16±0.03 | 0.16±0.03 | 0.04±0.04 | 0.04±0.02 | 0.06±0.04 |
| rMG-lM1 | 0.16±0.02 | 0.16±0.02 | 0.16±0.02 | 0.04±0.03 | 0.04±0.04 | 0.05±0.04 |
| rMG-rM1 | 0.16±0.03 | 0.16±0.03 | 0.16±0.03 | 0.04±0.03 | 0.04±0.03 | 0.05±0.03 |
| rMG-lS1 | 0.16±0.04 | 0.16±0.04 | 0.16±0.03 | 0.04±0.02 | 0.04±0.03 | 0.06±0.04 |
| rMG-rS1 | 0.17±0.01 | 0.16±0.02 | 0.16±0.02 | 0.04±0.03 | 0.04±0.03 | 0.06±0.04 |
| rMG-lSMA | 0.16±0.02 | 0.16±0.02 | 0.16±0.02 | 0.04±0.03 | 0.04±0.03 | 0.05±0.04 |
| rMG-rSMA | 0.17±0.01 | 0.17±0.02 | 0.16±0.02 | 0.04±0.03 | 0.04±0.03 | 0.05±0.04 |
| lRF-lPFC | 0.15±0.03 | 0.14±0.04 | 0.14±0.05 | 0.04±0.03 | 0.06±0.07 | 0.04±0.02 |
| lRF-rPFC | 0.14±0.02 | 0.14±0.04 | 0.15±0.05 | 0.03±0.03 | 0.04±0.02 | 0.04±0.03 |
| lRF-lM1 | 0.15±0.02 | 0.16±0.04 | 0.15±0.05 | 0.03±0.02 | 0.04±0.03 | 0.04±0.04 |
| lRF-rM1 | 0.14±0.02 | 0.15±0.03 | 0.15±0.05 | 0.04±0.02 | 0.03±0.02 | 0.04±0.04 |
| lRF-lS1 | 0.14±0.03 | 0.16±0.04 | 0.15±0.06 | 0.04±0.02 | 0.03±0.02 | 0.04±0.03 |
| lRF-rS1 | 0.14±0.02 | 0.15±0.04 | 0.14±0.06 | 0.04±0.02 | 0.04±0.02 | 0.04±0.04 |
| lRF-lSMA | 0.14±0.03 | 0.15±0.03 | 0.15±0.05 | 0.04±0.02 | 0.04±0.02 | 0.04±0.04 |
| lRF-rSMA | 0.15±0.03 | 0.15±0.03 | 0.14±0.05 | 0.03±0.02 | 0.03±0.02 | 0.04±0.04 |
| rRF-lPFC | 0.13±0.05 | 0.14±0.03 | 0.15±0.04 | 0.04±0.03 | 0.04±0.02 | 0.04±0.03 |
| rRF-rPFC | 0.12±0.05 | 0.13±0.03 | 0.15±0.05 | 0.04±0.04 | 0.04±0.03 | 0.05±0.03 |
| rRF-lM1 | 0.14±0.02 | 0.15±0.02 | 0.15±0.02 | 0.04±0.03 | 0.04±0.03 | 0.05±0.03 |
| rRF-rM1 | 0.13±0.02 | 0.14±0.02 | 0.16±0.02 | 0.04±0.04 | 0.04±0.03 | 0.04±0.03 |
| rRF-lS1 | 0.14±0.02 | 0.15±0.02 | 0.14±0.02 | 0.04±0.05 | 0.04±0.03 | 0.04±0.03 |
| rRF-rS1 | 0.14±0.05 | 0.14±0.03 | 0.15±0.03 | 0.04±0.03 | 0.04±0.02 | 0.04±0.03 |
| rRF-lSMA | 0.13±0.06 | 0.14±0.03 | 0.15±0.04 | 0.04±0.04 | 0.04±0.03 | 0.04±0.03 |
| rRF-rSMA | 0.13±0.05 | 0.14±0.03 | 0.15±0.04 | 0.04±0.04 | 0.04±0.03 | 0.05±0.04 |
| lLBF-lPFC | 0.16±0.04 | 0.16±0.05 | 0.16±0.03 | 0.04±0.05 | 0.06±0.06 | 0.05±0.03 |
| lLBF-rPFC | 0.15±0.04 | 0.16±0.05 | 0.16±0.03 | 0.04±0.04 | 0.06±0.05 | 0.05±0.03 |
| lLBF-lM1 | 0.15±0.04 | 0.17±0.06 | 0.17±0.04 | 0.04±0.05 | 0.06±0.06 | 0.05±0.03 |
| lLBF-rM1 | 0.15±0.05 | 0.17±0.05 | 0.17±0.04 | 0.04±0.04 | 0.06±0.06 | 0.05±0.02 |
| lLBF-lS1 | 0.16±0.05 | 0.17±0.05 | 0.16±0.04 | 0.04±0.04 | 0.06±0.05 | 0.05±0.03 |
| lLBF-rS1 | 0.16±0.04 | 0.17±0.06 | 0.16±0.04 | 0.04±0.04 | 0.06±0.05 | 0.05±0.03 |
| lLBF-lSMA | 0.16±0.04 | 0.16±0.06 | 0.16±0.04 | 0.04±0.04 | 0.06±0.06 | 0.05±0.03 |
| lLBF-rSMA | 0.16±0.04 | 0.17±0.06 | 0.16±0.04 | 0.04±0.04 | 0.06±0.05 | 0.05±0.02 |
| rLBF-lPFC | 0.15±0.03 | 0.14±0.05 | 0.16±0.06 | 0.04±0.02 | 0.04±0.03 | 0.05±0.04 |
| rLBF-rPFC | 0.14±0.03 | 0.14±0.05 | 0.17±0.07 | 0.04±0.03 | 0.04±0.03 | 0.05±0.04 |
| rLBF-lM1 | 0.15±0.04 | 0.15±0.05 | 0.17±0.03 | 0.04±0.04 | 0.04±0.02 | 0.05±0.04 |
| rLBF-rM1 | 0.14±0.02 | 0.15±0.02 | 0.17±0.02 | 0.04±0.02 | 0.04±0.02 | 0.05±0.04 |
| rLBF-lS1 | 0.15±0.02 | 0.15±0.02 | 0.17±0.02 | 0.04±0.02 | 0.04±0.02 | 0.05±0.04 |
| rLBF-rS1 | 0.15±0.03 | 0.15±0.06 | 0.16±0.06 | 0.04±0.02 | 0.04±0.03 | 0.05±0.04 |
| rLBF-lSMA | 0.15±0.03 | 0.15±0.05 | 0.17±0.06 | 0.04±0.03 | 0.04±0.02 | 0.05±0.04 |
| rLBF-rSMA | 0.15±0.03 | 0.15±0.05 | 0.16±0.06 | 0.04±0.02 | 0.04±0.02 | 0.05±0.04 |
